# Supplementary material for: Adaptation of Plasmodium falciparum to humans involved the loss of an ape-specific erythrocyte invasion ligand
Source: PubMed Central journal article supplement (PMC6778099; doi:10.1038/s41467-019-12294-3), 2019-10-04
Supplement: 41467_2019_12294_MOESM1_ESM.pdf [file 41467_2019_12294_MOESM1_ESM.pdf]

**Supplementary Information**

**Adaptation of *Plasmodium falciparum* to humans involved the loss of an ape-specific erythrocyte invasion ligand**

**Proto et al**

```

1
Pf ALCKLENYIKNEYDRENSFYILNNKVEKEYEKGTTNNNINIDKLANGSLEMLDK-KEALLEDKKNVDNKDIKEQLPENNK
G1 ALCKLENYIKNEYDRENSFYILNNKVEKEYEKGTTNNNINIDKLANGSLEMLEVVKKEALLEDKKNVDNKDIKEOLPEHNK
G2 TLCKLENYLKNEYEKENSFNIINNKKVEKEYDSGTTNNNVNIDSSNGKLELLEVKEDALLND-----KNIQEQEAENNI
C1 ALCKLENYIKNEYDKENSFYIINNKKVEKDYSGMNNNNINIDKLPNGSLEILKVKKEALLGDKKNIDNKDIKEQLPENNK
C2 TLCKLENYLKNEYEKENSFNIINNKKVVEKEYDSGTTNNNVNIDRSSNGRLELLELVKEEALLND-----KNIIEEEAENNI
C3 TLCKLENNIKNKYDKENSFYIINNKKVEKAYEGGTTNNNINIDKLSNGSLEMLEVKEETLFDDKKNTHNKDIKEQLTENNI
B1 ALCKLENYIKNEYES-----GM-----NNNINIDKLPNGSLEILKVKKEALLGDKKNIDNKDIKEQLPENNK

81
Pf NFEKILHEDICKLNKENIEKEGLYKPNTFKSIGNDLLYKKGKLNFLY EYGMEL LHINKVPMNRMNNSRGLGDSNMSFLD
G1 NFEKILYEDICKLNKENIEKEGLYKPNTFKSIGNDLLYKKGKLNFLY EYGMEL LHINKVPMNRMNNSRGLGDSNMSFLD
G2 NFEKILHKNVYELNKESIEKEGLYKPNTIKNIEDES LYKKGKLNFLY EYGMEL LNINKVRMNMNNSRGLGDSNTSFLD
C1 NFEKILHKDICKLNKENIEKEGLYKPNTFKNIENDLLYKKGKLNFLYDYGMEL LHINKAPMNRMNNSRGLGDGMSFLD
C2 NFEKILYKNVCELNKENIEKEGLYKPNTIKNIENDS LYKKGMLNFLY EYGMEL LNINKVPMNMNNSRVLGDSKMSFLD
C3 NYEEKNLLKDICILNKEKIEKEGLYKPSTFKYIENDS LYKKGKLNFLYVYGMEL LHINKTSMNRMNNSRVLGDSNMSYLD
B1 NFEKILHKDICKLNKENIENGLYKPNTFKNIENDLLYKKGKLNFLY EYGMEL LHINKARMNRMNNSRGLGDSNMSFLD

161
Pf ISNNNMNSLNSM---NNLNNSNFDSSNSLSFVDMKSIHRCIKKRAKGERDWACNDKNTKEPNICVSDRRVOLCTGNLIE
G1 ISNNNMNSLNNLNNLNNLNNSNFDSSNSLSFVDMKSIHRCIKKRAKGERDWACNDKNTKEPNICVSDRRVOLCTGNLIE
G2 ISNNNNKN-----KNNNMNLSLNFVDMKSVHRCITKRRKGEKDWACNDKNTKEPNICVSDRRVOLCTGNLVD
C1 ISNNNMNLSNSL-----DSLNSLSFVDMKSIHRCIKKRAKGERDWACNNTKEPNICVSDRRVOLCTGNLIE
C2 ISNNNNKN-----KNNNMNLSLNFVDMKSIHRCITKRRKGEKDWACNDKNTKEPNICVSDRRVOLCTGNLVD
C3 ISNNTNN--NMMNSLNSSNLSLNFVDMKFLHRCIKKRNKGERDWACNDINTKEPNICVSDRRVOLCTGNLID
B1 ISNNNMNLLNSVDN-----LDSLNSLSFVDMKSIHRCIKKRAKGERDWACNNTKEPNICVSDRRVOLCTGNLIE

241
Pf LPINDSTKEKFKEKLILAAQKEGSLLEKFGKKYNEEFCLNLKWSYGDYGDIIK
G1 LPINDSTDKFKEKLILAAQKEGSLLEKFGKKYNEEFCLNLKWSYGDYGDIIK
G2 LSIDESTKEKFKEKLIIAAKREGTLLFEKFGKKYTAEFCLNLKWSYSDYGDIIK
C1 LPISDSTKEKFKEKLILAAQKEGSLLEKFGKKYNEEFCLNLKWSYGDYGDIIK
C2 LSINDATKEKFEGKLIIAAKREGTLLFEKFGKKYTAEFCLNLKWSYSDYGDIIK
C3 IPTNESTKEKFKEKLILAAKREGSLLFEKFGKIYNAEFCLNLKWSYSDYGDIIK
B1 LPISDSTKEKFKEKLILAAEKEGNLLEKFGKKYNEEFCLNLKWSYGDYGDIIK

```

### Supplementary Figure 1. PfEBA165 full alignment.

Exemplar EBA165 amino acid sequences (~800 bp amplified fragment) from ape-infective *Laverania* species (G1, *Plasmodium praefalciparum*; G2, *P. adleri*; G3, *P. blacklocki*; C1, *P. reichenowi*; C2, *P. gaboni*; C3, *P. billcollinsi*; B1, *P. lomamiensis*) as recently described<sup>3</sup>.

The 3D7 *P. falciparum* sequence shown is that which would be translated if both frameshifts were corrected, and represents the relevant fragment of the full-length corrected PfEBA165 protein ectodomain that was expressed recombinantly.

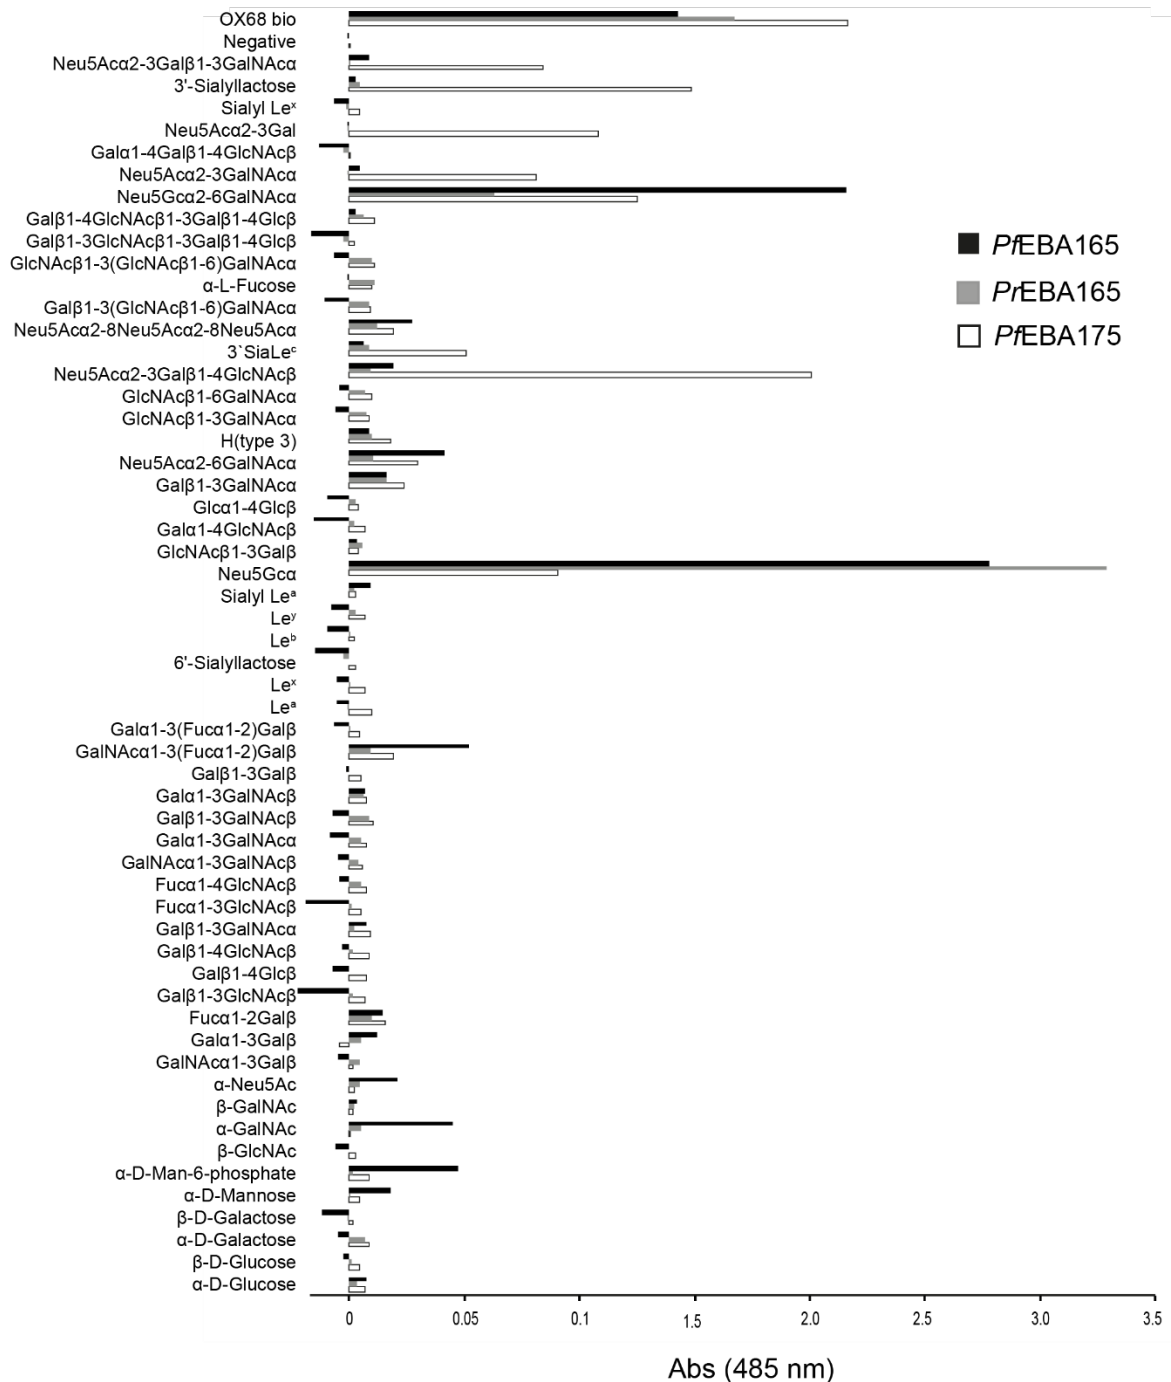

**Supplementary Figure 2. PfEBA165, PrEBA165 and PfEBA175 bind primarily sialic acid containing glycans**

Purified mono-biotinylated glycans (GlycoTech) were immobilised on streptavidin-coated 96 well plates and probed with normalised recombinant pentameric β-lactamase-tagged PfEBA165, PrEBA165 and PfEBA175 (black, grey, and white bars, respectively). Binding was detected by incubation with nitrocefin, a substrate for β-lactamase. As expected from

the known binding specificity of PfEBA175, most binding was detected with glycans containing sialic acids. Data points represent mean values of three technical replicates, conducted on the same batches of recombinant proteins and glycans.

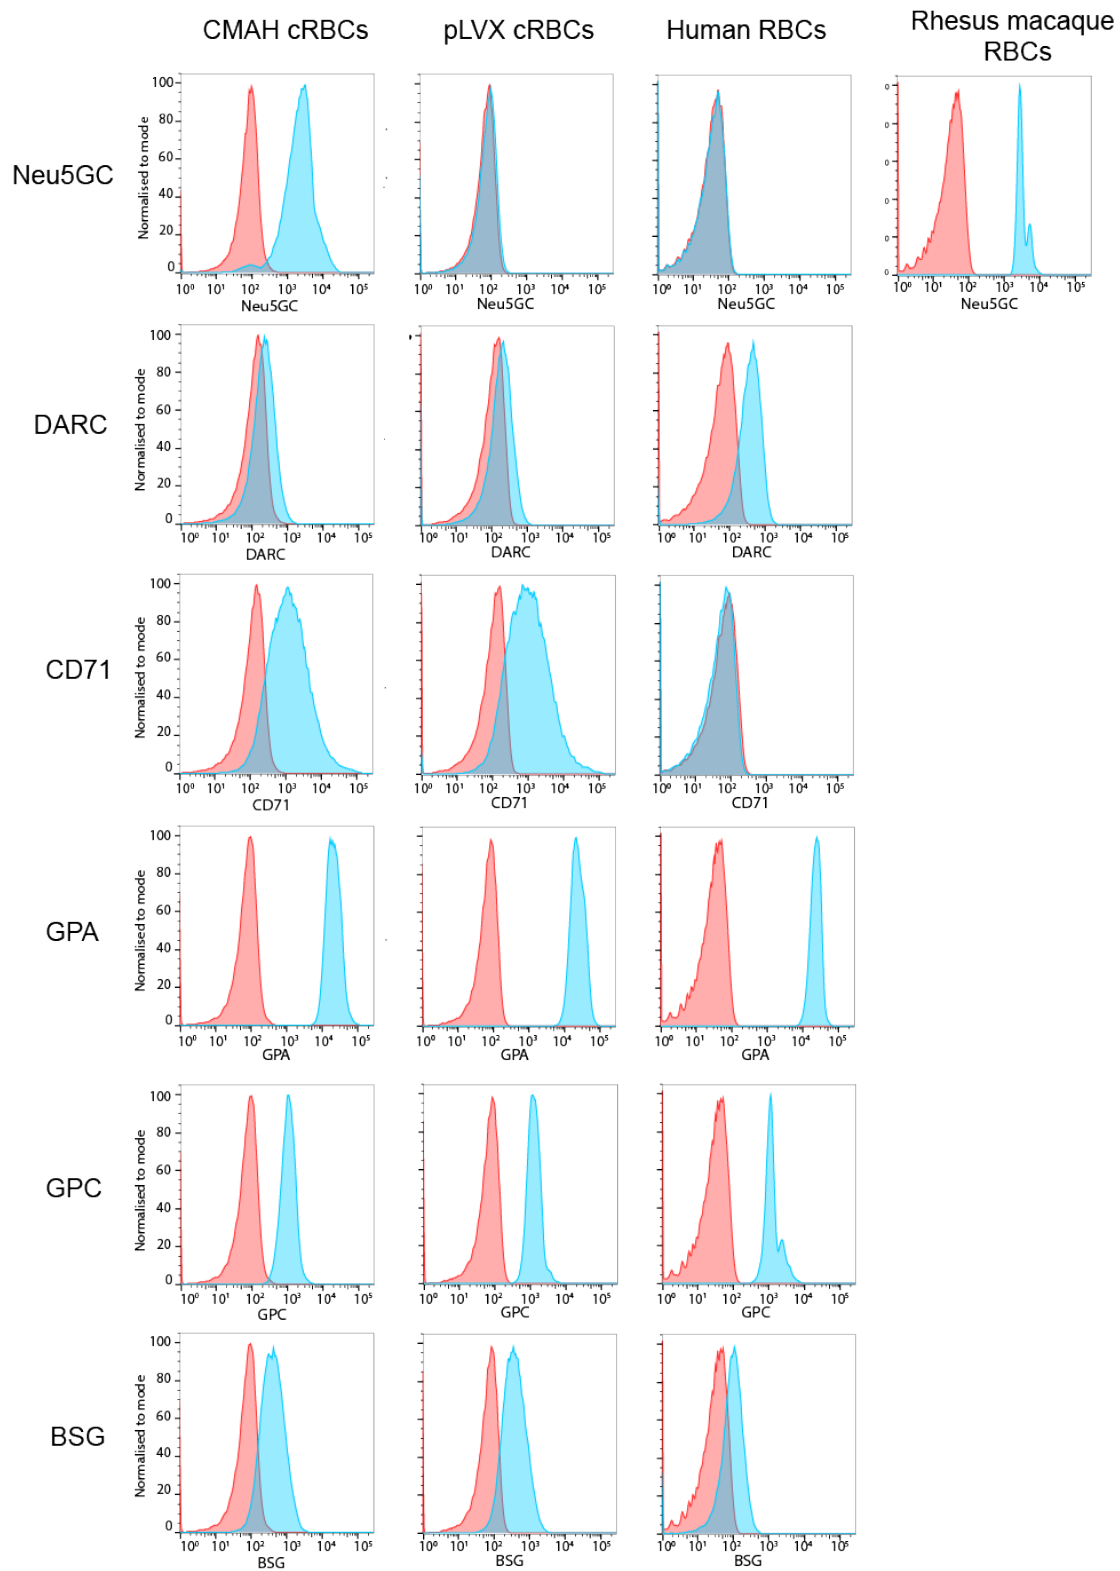

**Supplementary Figure 3. CMAH expression has no impact on surface levels of major erythrocyte receptors.**

Surface expression of Basigin (BSG), Glycophorin C (GPC), Glycophorin A (GPA), CD71, Duffy Antigen Receptor for Chemokines (DARC) was measured by incubating cultured red

blood cells (cRBCs) or human red blood cells (RBCs) with either commercial monoclonal antibodies followed by fluorescently tagged secondary antibodies (BSG and Neu5Gc), or primary antibodies directly conjugated to fluorophores (DARC, CD71, GPA, GPC), with binding detected by flow cytometry (blue traces). Secondary antibodies alone were used as a negative control for binding (red traces). There was no detectable difference in the surface expression of known *P. falciparum* invasion receptors (BSG, GPA, GPC) between cRBCs produced from hSCs transfected with control (pLVX) or *CMAH* expressing vectors. cRBCs expressed higher levels of CD71 and lower levels of DARC compared to human RBCs, as has been previously shown with the cRBC expression system, thought to reflect the fact that cRBCs represent more immature RBCs<sup>1,2</sup>. Expression of *CMAH* resulted in Neu5Gc expression on the cRBC surface. NeuGc is present in primate erythrocytes such as ape and macaque (shown), but not on human erythrocytes or control cRBCs.

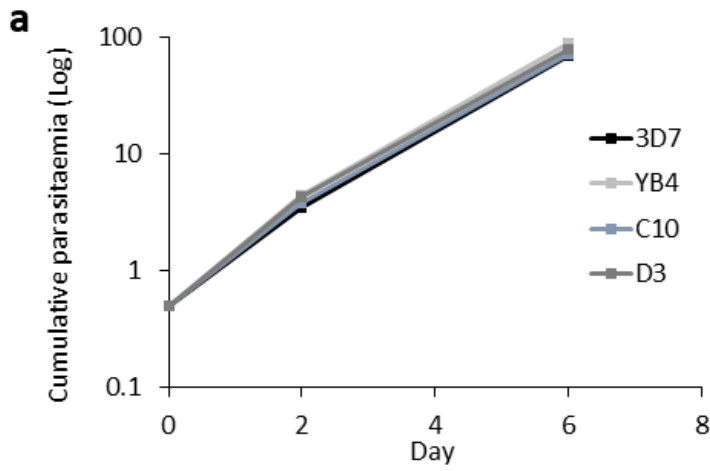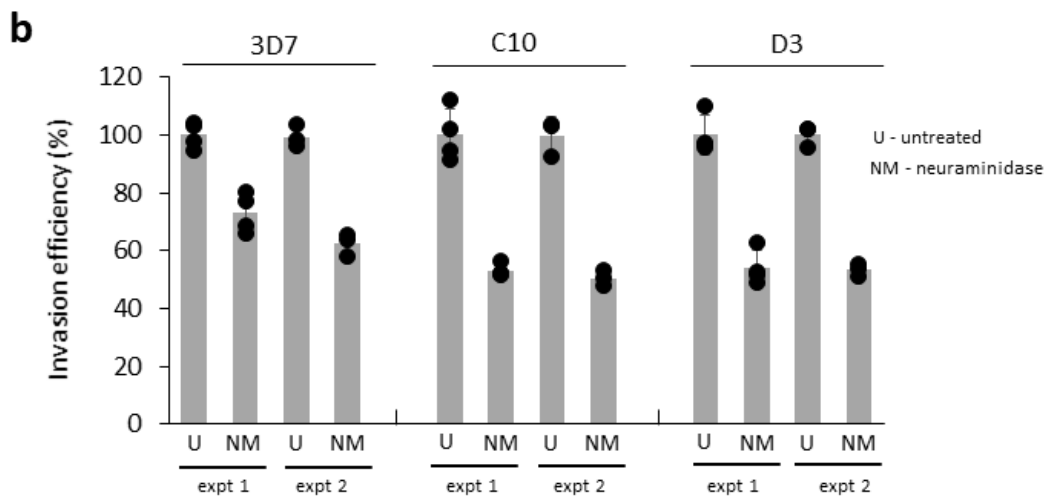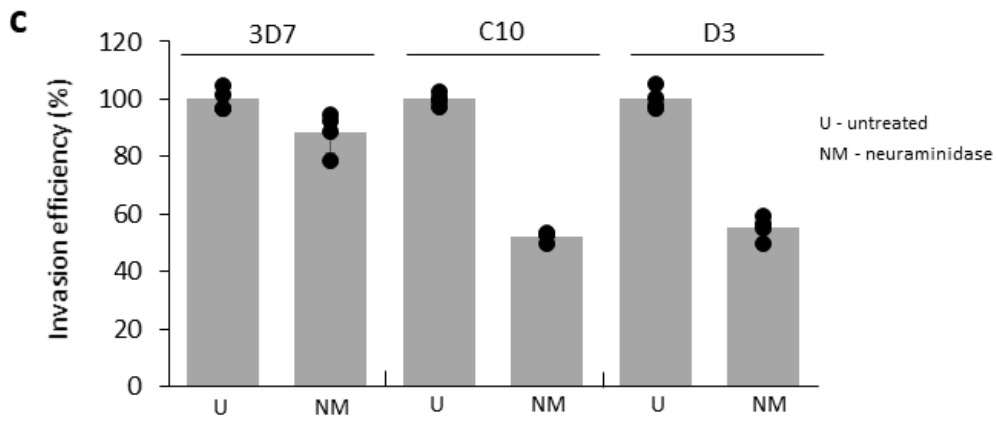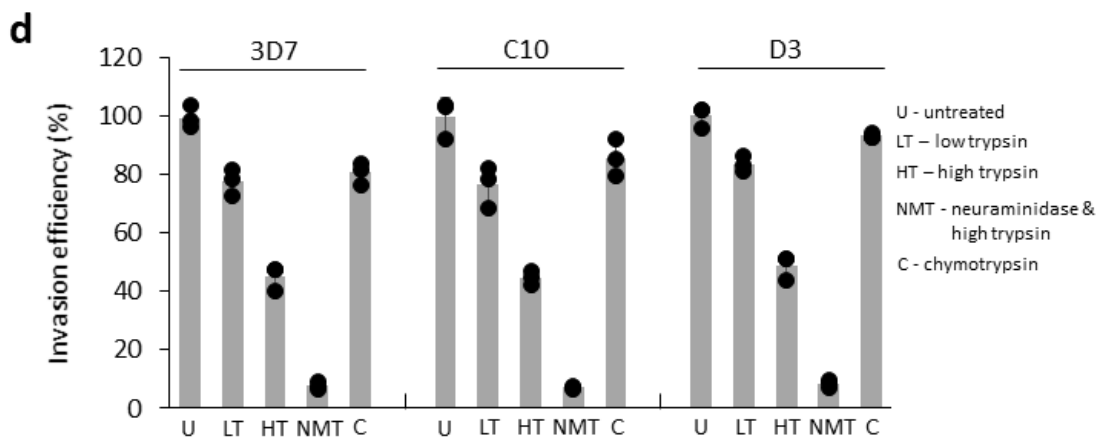

**Supplementary Figure 4. Genome editing of PfEBA165 to correct frameshift mutations has no impact on erythrocyte invasion profile or *in vitro* growth rate.**

A) Relative growth of *P. falciparum* 3D7 (parental), YB4 (cloned transfectant with 1 frameshift corrected) and C10 and D3 (cloned transfectant lines with both frameshifts corrected) lines during continuous culture in human erythrocytes. Lines were diluted with fresh red blood cells every two days, parasitaemia counted using flow cytometry, and cumulative parasitaemia calculated adjusting for the dilution factors. There was no difference in growth rates between the lines. Data points represents mean values of three biological replicates. Error bars represent standard deviation.

B) Invasion of *P. falciparum* 3D7 (parental), and C10 and D3 (cloned transfectant lines with both frameshifts corrected) into human erythrocytes that were either untreated (u), or treated with neuraminidase (NM) to remove surface sialic acids. Erythrocytes were labelled with fluorescent dyes, and new invasion events were identified using a two-colour flow cytometry assay<sup>3</sup>. Two separate assays were conducted (expt 1 and expt 2). Invasion rates are expressed relative to the invasion into untreated human erythrocytes of each strain in separate experiments. Bars represent mean values of four technical replicates for expt 1 and three technical replicates for expt 2, with individual data points overlaid as black circles. Error bars represent standard deviation.

C) Invasion of *P. falciparum* 3D7 (parental), and C10 and D3 (cloned transfectant lines with both frameshifts corrected) into chimpanzee erythrocytes that were either untreated (u), or treated with neuraminidase (NM) to remove surface sialic acids. Erythrocytes were labelled with fluorescent dyes, and new invasion events were identified using a two-colour flow cytometry assay<sup>3</sup>. Invasion rates are expressed relative to the invasion into untreated chimpanzee erythrocytes of each strain. Bars represent mean values of four technical replicates from one assay, with individual data points overlaid as black circles. Error bars represent standard deviation.

D) *P. falciparum* 3D7 (parental), and C10 and D3 (cloned transfectant lines with both frameshifts corrected) lines were incubated with enzyme treated erythrocytes for 24 hours,



and invasion measured using two-colour flow cytometry to count invasion only into treated erythrocytes. Data points represent mean values of three technical replicates from a single assay. Error bars represent standard deviation. Invasion rates are expressed relative to invasion into untreated erythrocytes for each parasite line.

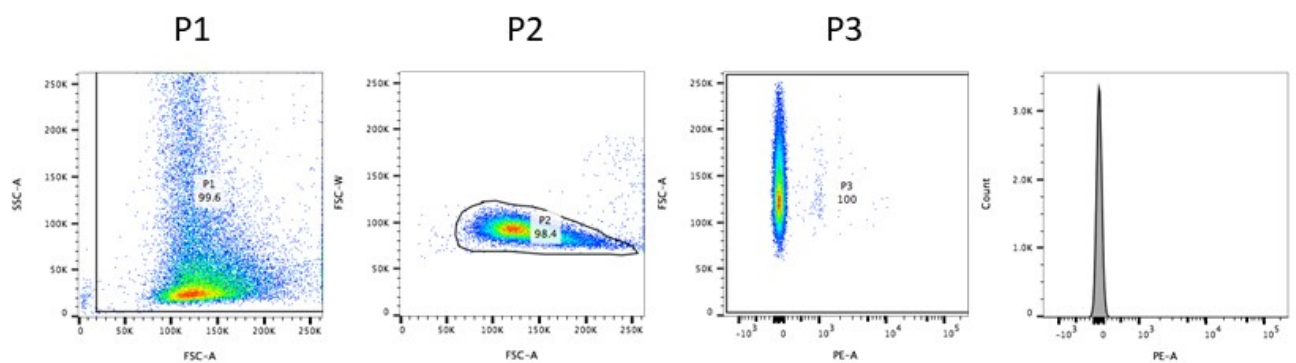

**Supplementary Figure 5. Flow cytometry gating strategy for erythrocyte binding assays.**

Gates were determined using control samples with cells only. Cells were selected using gates P1 (side scatter-area (SSC-A) vs forward scatter-area (FSC-A)), P2 (forward scatter-width (FSC-W) and forward scatter-area (FSC-A)), and P3 (forward scatter-area (FSC-A) and phycoerthrin-area (PE-A)).

**Supplementary Table 1. Significantly down-regulated genes in *PfEBA165* corrected lines.**

| GeneID        | Gene description                                           | Log <sub>2</sub> FC<br>C10 | p-value<br>C10 | Log <sub>2</sub> FC<br>D3 | p-value<br>D3 |
|---------------|------------------------------------------------------------|----------------------------|----------------|---------------------------|---------------|
| Pf3D7_0424200 | Reticulocyte binding protein homologue (Rh4)               | -1.03                      | 3.32E-42       | NA                        | NA            |
| Pf3D7_0424300 | Erythrocyte binding antigen 165 (EBA165)                   | -2.20                      | 8.33E-137      | -2.18                     | 3.41E-78      |
| Pf3D7_0424400 | Surface-associated interspersed protein 4.2 (SURFIN 4.2)   | -1.28                      | 0.028          | -1.78                     | 0.003         |
| Pf3D7_0424500 | Serine/threonine protein kinase, FIKK family               | -1.25                      | 3.33E-14       | -1.23                     | 3.48E-10      |
| Pf3D7_0424600 | Plasmodium exported protein (PHISTb, unknown function)     | -0.89                      | 2.87E-26       | -0.69                     | 0.001         |
| Pf3D7_0424700 | Serine/threonine protein kinase, FIKK family               | -0.65                      | 7.81E-05       | -1.44                     | 1.16E-10      |
| Pf3D7_0424800 | Plasmodium exported protein (PHISTa, unknown function)     | -2.27                      | 0.0007         | -1.84                     | 0.003         |
| Pf3D7_0424900 | Plasmodium exported protein (PHISTb, unknown function)     | -1.18                      | 8.08E-08       | -1.64                     | 1.08E-08      |
| Pf3D7_1147000 | Sporozoite and liver stage asparagine-rich protein (SLARP) | -6.29                      | 9.31E-234      | -6.62                     | 1.13E-159     |
| Pf3D7_1147100 | Dynein light chain, putative                               | -3.69                      | 0.0006         | -3.44                     | 0.0004        |
| Pf3D7_1147200 | Tubulin tyrosine ligase, putative                          | -3.74                      | 2.43E-110      | -3.16                     | 2.87E-54      |

Significantly down-regulated gene clusters in *PfEBA165* corrected lines (double-edited clones C10 and D3). Genes that are significantly down-regulated ( $p\text{-value} \leq 0.05$ ) in both C10 and D3 relative to the parent line 3D7 in the order are listed in which they appear along the two down-regulated clusters of genes located on chromosomes 4 and 11, respectively.

**Supplementary Table 2. Oligonucleotides used in this study**

| <b>Oligo</b> | <b>Description</b>                                                                | <b>Gene name</b> | <b>Gene ID</b> | <b>5' to 3' sequence</b>   |
|--------------|-----------------------------------------------------------------------------------|------------------|----------------|----------------------------|
| OL176        | gRNA 5' frameshift.<br>Anneal to OL177.                                           | <i>PfEAB165</i>  | PF3D7_0424300  | ATTGATAAGTTGGCAAATGGGAGTT  |
| OL177        | gRNA 5' frameshift.<br>Anneal to OL176                                            | <i>PfEAB165</i>  | PF3D7_0424300  | AAACAACCTCCCATTTGCCAACTTAT |
| OL186        | Phosphorothioate modified oligo. Product for transfection, targets 5' frameshift. | <i>PfEAB165</i>  | PF3D7_0424300  | C*A*AGAAAAGAAAGAAAAACAAGC  |
| OL187        | Phosphorothioate modified oligo. Product for transfection, targets 5' frameshift. | <i>PfEBA165</i>  | PF3D7_0424300  | G*T*ACTCCCTTCTTTTTGTGC     |
| OL231        | gRNA 3' frameshift.<br>Anneal to OL232.                                           | <i>PfEAB165</i>  | PF3D7_0424300  | ATTGAACATAAAGAGAAATTTCCAA  |
| OL232        | gRNA 3' frameshift.<br>Anneal to OL231.                                           | <i>PfEAB165</i>  | PF3D7_0424300  | AAACTTGGAAATTTCTCTTTATGTT  |
| OL257        | Phosphorothioate modified oligo. Product for transfection, targets 3' frameshift. | <i>PfEAB165</i>  | PF3D7_0424300  | C*A*AGAGAAATTGATTTTGGCAGC  |
| OL258        | Phosphorothioate modified oligo. Product for transfection, targets 3' frameshift. | <i>PfEBA165</i>  | PF3D7_0424300  | G*T*TCAAGATACATATTCTCATGC  |
| OL293        | Amplify PCR product for sequencing                                                | <i>PfEAB165</i>  | PF3D7_0424300  | TTAACCTGATTTTGATGC         |
| OL271        | Amplify PCR product for sequencing                                                | <i>PfEAB165</i>  | PF3D7_0424300  | TCTCTCCACATATCTTTACC       |
| OL265        | qRT-PCR                                                                           | <i>PfAMA1</i>    | PF3D7_1133400  | CAGCTGCTGTCGCTGTATTA       |
| OL266        | qRT-PCR                                                                           | <i>PfAMA1</i>    | PF3D7_1133400  | CCATAATCTTGTGGTTCATCCATTT  |
| OL307        | qRT-PCR                                                                           | <i>PfEBA165</i>  | PF3D7_0424300  | AGGTGGCACACAAAGTAGTC       |
| OL308        | qRT-PCR                                                                           | <i>PfEBA165</i>  | PF3D7_0424300  | CAGTGCTTGGATCTTCTCTACC     |
| OL315        | qRT-PCR                                                                           | <i>Pfcyp87</i>   | PF3D7_0510200  | AAACGGGAGATCCTTCAGGT       |
| OL316        | qRT-PCR                                                                           | <i>Pfcyp87</i>   | PF3D7_0510200  | AAGGACATGGGACAGTGGTT       |

## References:

1. Dankwa, S., Lim, C., Bei, A. K., Jiang, R. H. Y., Abshire, J. R. et al. Ancient human sialic acid variant restricts an emerging zoonotic malaria parasite. *Nat. Commun.* **7**, 11187 (2016).
2. Giarratana, M. C., Rouard, H., Dumont, A., Kiger, L., Safeukui, I. et al. Proof of principle for transfusion of in vitro-generated red blood cells. *Blood* **118**, 5071-5079 (2011).
3. Theron, M., Hesketh, R. L., Subramanian, S. & Rayner, J. C. An adaptable two-color flow cytometric assay to quantitate the invasion of erythrocytes by *Plasmodium falciparum* parasites. *Cytometry A* **77**, 1067-1074, doi:10.1002/cyto.a.20972 (2010).
